# Supplementary material
Source: PubMed Central journal article supplement (PMC533047)

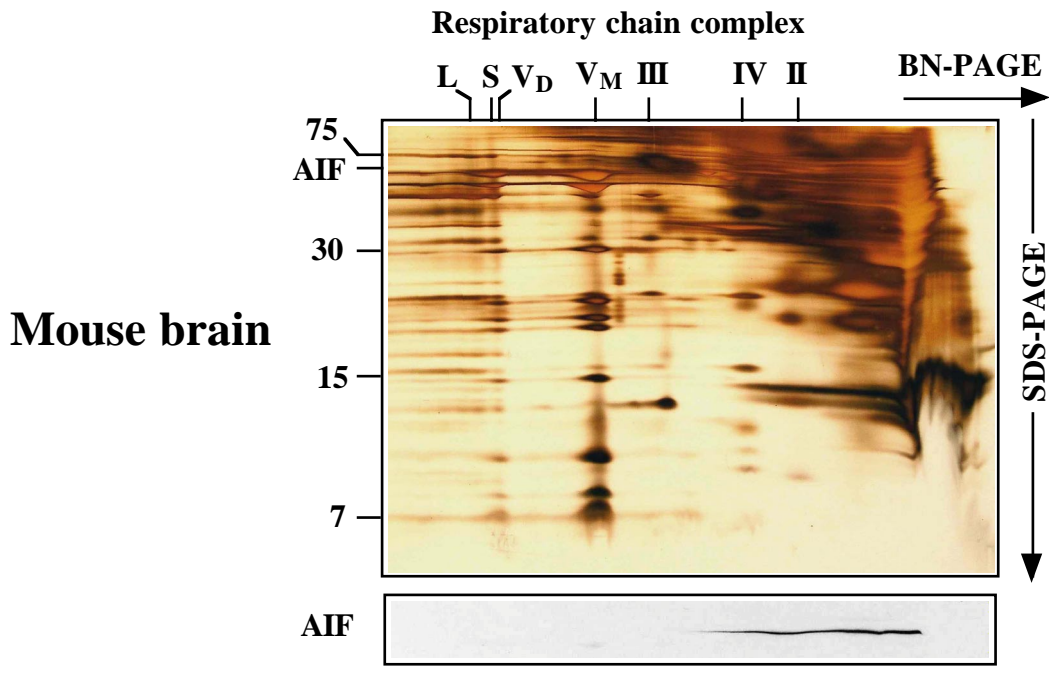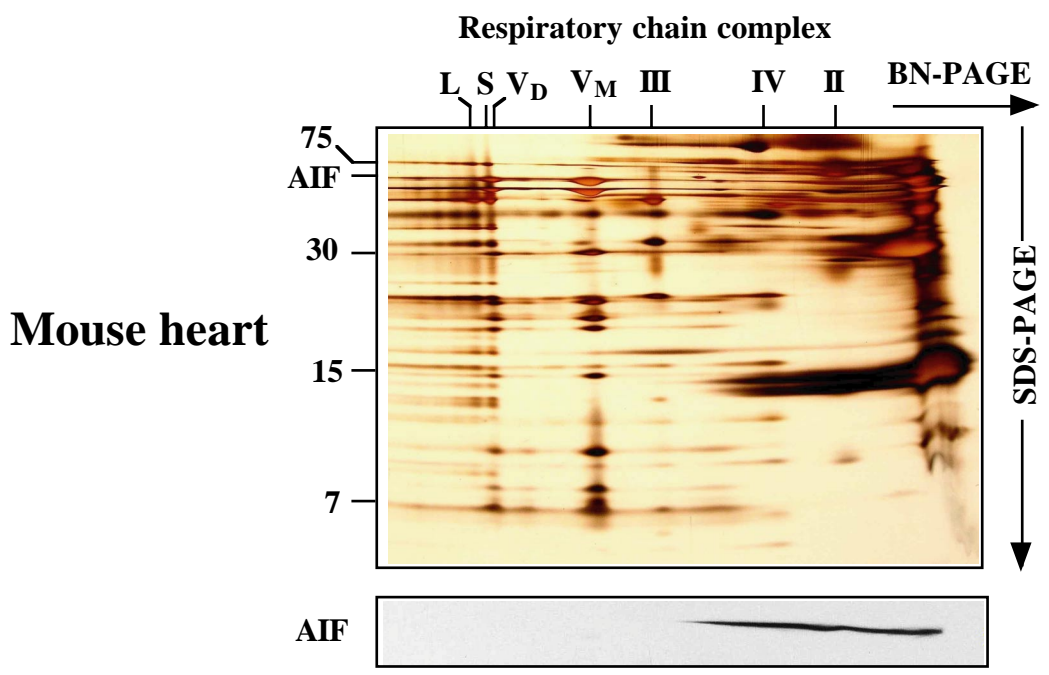

**Supplementary Fig.1**

Supplement: 7600461s1.pdf [file 7600461s1.pdf]

**A**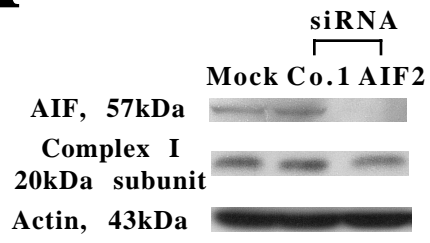**B**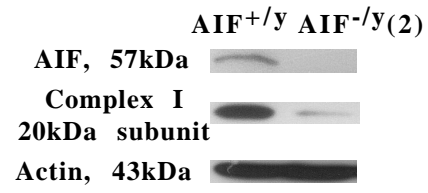

## Supplementary Fig.2

Supplement: 7600461s2.pdf [file 7600461s2.pdf]

**A**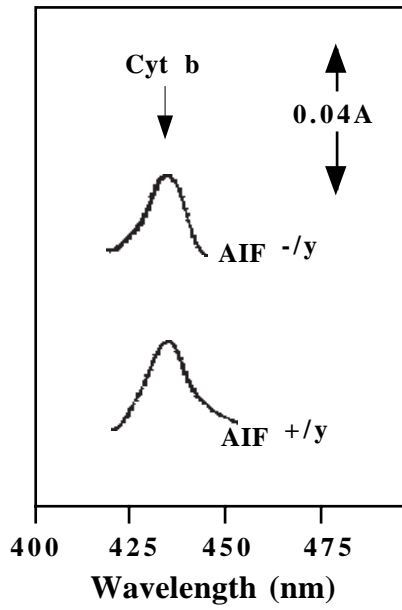**B**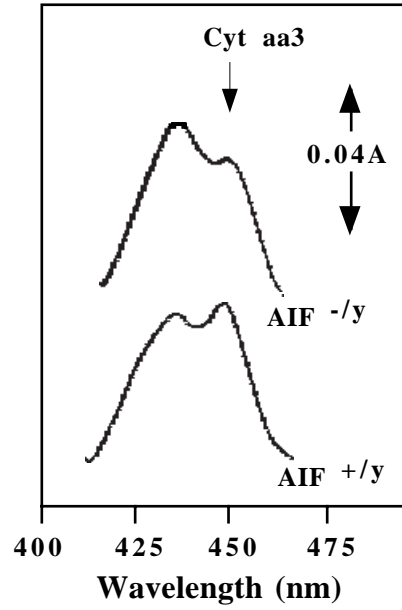**Supplementary Fig.3**

Supplement: 7600461s3.pdf [file 7600461s3.pdf]

**A**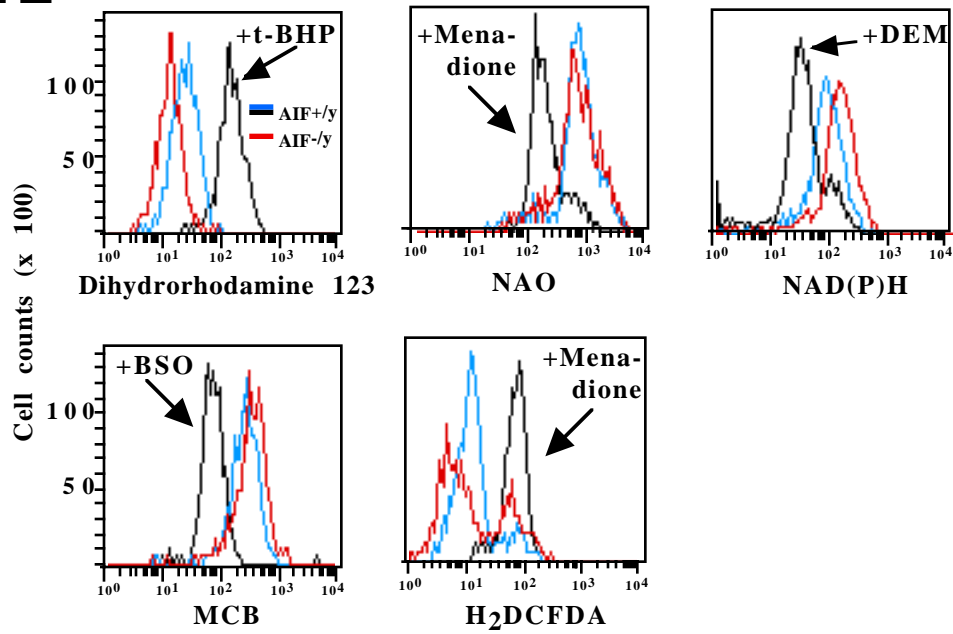**B**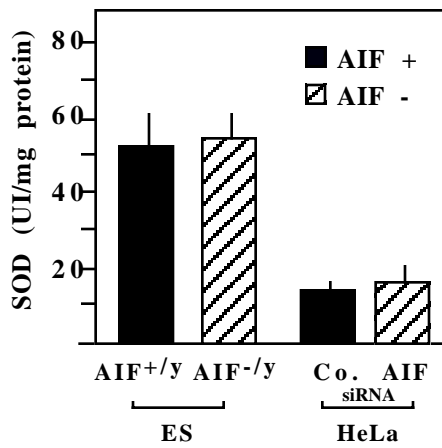**Supplementary Fig.4**

Supplement: 7600461s4.pdf [file 7600461s4.pdf]
